# Supplementary material for: Description and optimization of a multiplex bead-based flow cytometry method (MBFCM) to characterize extracellular vesicles in serum samples from patients with hematological malignancies
Source: PubMed Central journal article supplement (PMC9663305; doi:10.1038/s41417-022-00466-1), 2022-04-27

**Supplementary Fig.1** Correlation analyses of serum-derived EV markers and cellular markers CD14, CD19, CD3 and CD56 in leukemic and healthy samples

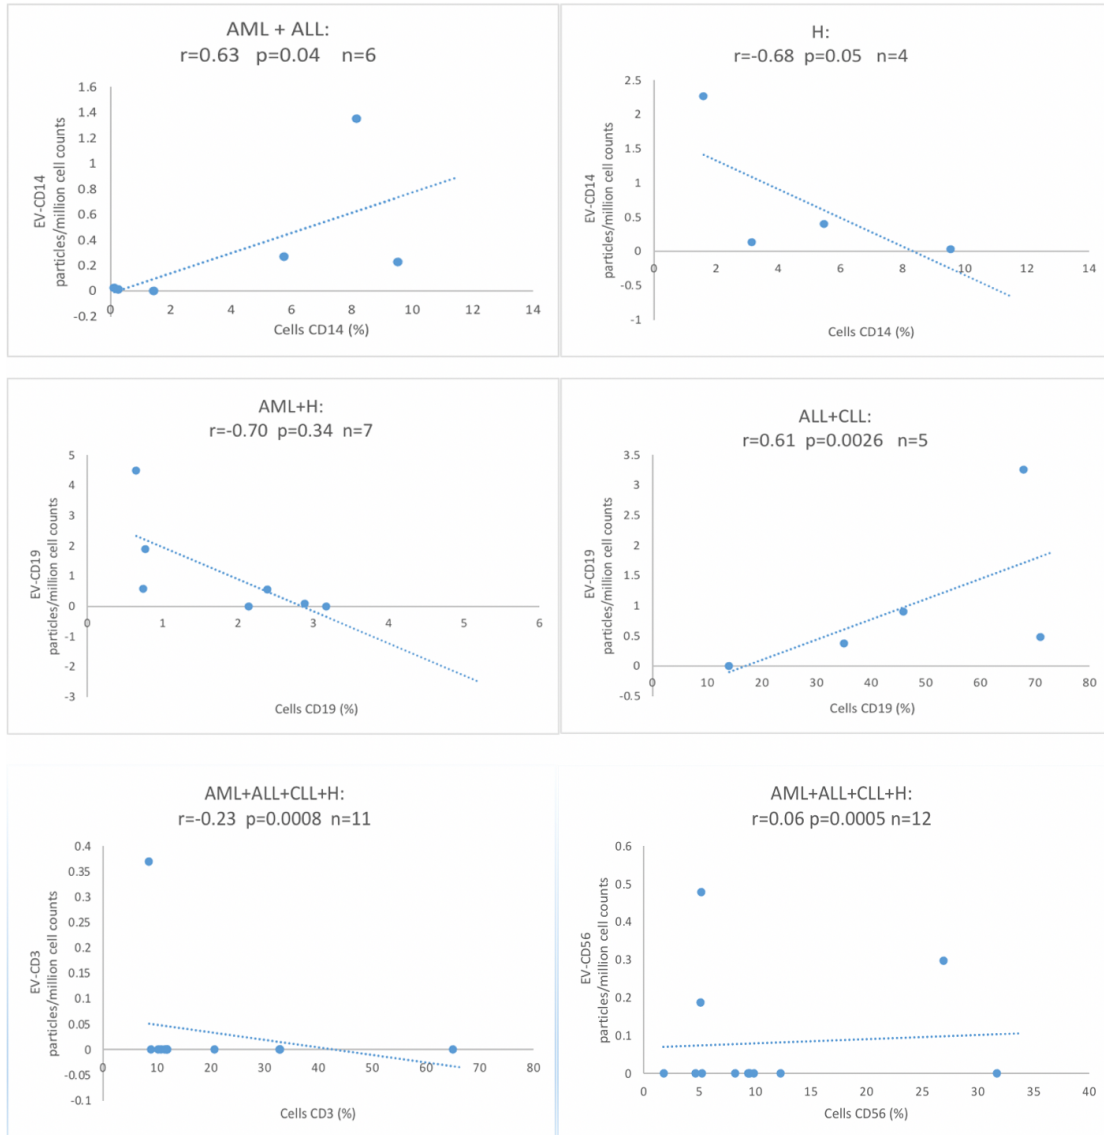

Supplement: 41417_2022_466_MOESM1_ESM.pdf [file 41417_2022_466_MOESM1_ESM.pdf]
